# Supplementary material for: Comparison of strategies to reduce meticillin-resistantStaphylococcus aureusrates in surgical patients: a controlled multicentre intervention trial
Source: HighWire-hosted journal article supplement (doi:10.1136/bmjopen-2013-003126), 2013-09-01
Supplement: bmjopen-2013-003126supp.pdf [file bmjopen-2013-003126supp.pdf]

## **SUPPLEMENTARY DATA FOR MANUSCRIPT:**

### **Comparison of strategies to reduce meticillin resistant *Staphylococcus aureus* rates in surgical patients: a controlled multicentre intervention trial**

Table A1: Meticillin resistant *Staphylococcus aureus* screening methods used in study centres in the screening and decolonisation arm and combined arm

Table A2: Study characteristics by study period and study arm

Table A3: Multiple segmented multilevel logistic regression model showing factors associated with monthly hand hygiene compliance rates

Table A4: Full model results for the multiple segmented multilevel Poisson regression models showing adjusted incidence rate ratios for changes in level and trend of nosocomial meticillin resistant *Staphylococcus aureus* rates

Table A5: Full model results for the multiple segmented multilevel Poisson regression models showing changes in nosocomial meticillin resistant *Staphylococcus aureus* rates for the subgroup analysis of clean surgery only

Table A6: Multiple segmented multilevel Poisson regression models showing nosocomial meticillin resistant *Staphylococcus aureus* rates in the washout phase by study arm

Table A7: Exploratory analysis using multiple segmented multilevel Poisson regression models including interventions implemented by centres as covariates in the model

Figure A1: Nosocomial meticillin resistant *Staphylococcus aureus* isolation rates from clinical specimens by hospital

**Table A1: Methicillin resistant *Staphylococcus aureus* screening methods used in study centres in the screening and decolonisation arm and combined arm**

| Study arm                    | Hospital | Chromogenic medium used            | Minimum time to detection (days)* | Months during intervention phase test used† | Molecular assay used     | Total assay time (hours)* | Months during intervention phase test used‡ |
|------------------------------|----------|------------------------------------|-----------------------------------|---------------------------------------------|--------------------------|---------------------------|---------------------------------------------|
| Screening and decolonisation | 2        | BBL CHROMagar (BD Diagnostics)     | 1.72                              | 1 to 12                                     | GeneOhm (BD Diagnostics) | 2 to 3                    | 1 to 10                                     |
|                              |          |                                    |                                   |                                             | GeneXpert (Cepheid)      | <1.5                      | 7 to 12                                     |
|                              | 3        | BBL CHROMagar (BD Diagnostics)     | 1.72                              | 1 to 12                                     | GeneXpert (Cepheid)      | <1.5                      | 6 to 12                                     |
|                              | 5        | BBL CHROMagar (BD Diagnostics)     | 1.72                              | 1 to 12                                     | GeneOhm (BD Diagnostics) | 2 to 3                    | 10 to 12                                    |
|                              | 6        | BBL CHROMagar (BD Diagnostics)     | 1.72                              | 1 to 12                                     | GeneXpert (Cepheid)      | <1.5                      | 8 to 12                                     |
| Combined                     | 4        | MRSA Select (Bio-Rad Laboratories) | 1.35                              | 1 to 12                                     | GeneOhm (BD Diagnostics) | 2 to 3                    | 1 to 12                                     |
|                              | 7        | ChromID (bioMérieux)               | 1.65                              | 1 to 12                                     | Not used                 | -                         | -                                           |

\*From Malhotra-Kumar S, Haccuria K, Michiels M, et al. Current trends in rapid diagnostics for methicillin-resistant *Staphylococcus aureus* and glycopeptide-resistant enterococcus species. *J Clin Microbiol* 2008;46:1577-87.

†Screening for methicillin resistant *Staphylococcus aureus* occurred during all study phases for centres in the combined arm using existing local methods.

‡For the screening and decolonisation arm, molecular assays were introduced during the latter part of the intervention phase. In one centre in this arm (Hospital 2) a locally available molecular assay was used from the commencement of the intervention phase.

**Table A2: Study characteristics by study period and study arm**

| Characteristic                                                        | Baseline phase | Intervention phase | Washout phase |
|-----------------------------------------------------------------------|----------------|--------------------|---------------|
| Duration (months)                                                     | 6 to 7*        | 12                 | 6             |
| Total admissions (n)                                                  | 33 608         | 63 810             | 29 332        |
| Enhanced hand hygiene                                                 | 18 379         | 34 996             | 16 413        |
| Screening and decolonisation                                          | 6692           | 12 279             | 6615          |
| Combined                                                              | 8537           | 16 535             | 6304          |
| Total patient-days (n)                                                | 264 035        | 496 975            | 249 119       |
| Enhanced hand hygiene                                                 | 150 757        | 286 667            | 135 745       |
| Screening and decolonisation                                          | 57 754         | 112 971            | 58 473        |
| Combined                                                              | 55 524         | 97 337             | 54 901        |
| Total surgical procedures (n)                                         | 27 768         | 49 747             | 22 123        |
| Enhanced hand hygiene                                                 | 13 227         | 25 003             | 12 706        |
| Screening and decolonisation                                          | 5400           | 9963               | 5074          |
| Combined                                                              | 9141           | 14 781             | 4343          |
| Surgical procedures in clean surgery wards (n)†                       | 12 916         | 21 463             | 8787          |
| Enhanced hand hygiene                                                 | 5160           | 9102               | 4693          |
| Screening and decolonisation                                          | 1310           | 2551               | 1185          |
| Combined                                                              | 6446           | 9810               | 2909          |
| Surgical procedures in other types of surgery wards (n)†              | 14 852         | 28 284             | 13 336        |
| Enhanced hand hygiene                                                 | 8067           | 15 901             | 8013          |
| Screening and decolonisation                                          | 4090           | 7412               | 3889          |
| Combined                                                              | 2695           | 4971               | 1434          |
| Mean patient-to-nurse ratio (SD)‡                                     | 6.55 (3.78)    | 6.67 (3.59)        | 6.87 (4.18)   |
| Enhanced hand hygiene                                                 | 6.46 (2.35)    | 6.73 (2.11)        | 6.99 (2.57)   |
| Screening and decolonisation                                          | 7.68 (5.11)    | 7.96 (4.74)        | 8.31 (5.52)   |
| Combined                                                              | 4.65 (1.62)    | 4.14 (1.17)        | 3.96 (1.30)   |
| Total number of patients MRSA positive on admission (%)§              | 269 (0.8)      | 724 (1.1)          | 228 (0.8)     |
| Enhanced hand hygiene                                                 | 167 (0.9)      | 272 (0.8)          | 136 (0.8)     |
| Screening and decolonisation                                          | 40 (0.6)       | 259 (2.1)          | 13 (0.2)      |
| Combined                                                              | 62 (0.7)       | 193 (1.2)          | 79 (1.3)      |
| Number of patients MRSA positive on admission by clinical culture (%) | 65 (0.2)       | 85 (0.1)           | 41 (0.1)      |
| Enhanced hand hygiene                                                 | 32 (0.2)       | 46 (0.1)           | 30 (0.2)      |
| Screening and decolonisation                                          | 31 (0.5)       | 27 (0.2)           | 11 (0.2)      |
| Combined                                                              | 2 (0.02)       | 12 (0.1)           | 0 (0)         |
| Number of patients MRSA positive on admission by screening swab (%)   | 204 (0.6)      | 639 (1.0)          | 187 (0.6)     |
| Enhanced hand hygiene                                                 | 135 (0.7)      | 226 (0.6)          | 106 (0.6)     |
| Screening and decolonisation                                          | 9 (0.1)        | 232 (1.9)          | 2 (0.03)      |
| Combined                                                              | 60 (0.7)       | 181 (1.1)          | 79 (1.3)      |

MRSA, methicillin resistant *Staphylococcus aureus*.

\*Baseline phase was 6 months in six hospitals and 7 months in four hospitals (two in the screening and decolonisation arm and one hospital in each of the enhanced hand hygiene and combined arms).

†Clean surgery wards included cardiothoracic, neuro-, orthopaedic, plastic, and vascular surgery. Other types of surgery wards included abdominal, general, and urological surgery.

‡Calculated by dividing the mean patient load by mean number of nurses working on the ward at a given time (averaged over day, evening, and night shifts).

§By screening or clinical culture.

**Table A3: Multiple segmented multilevel logistic regression model showing factors associated with monthly hand hygiene compliance rates\***

| Variable                                       | Adjusted odds ratio | 95% CI       | p Value |
|------------------------------------------------|---------------------|--------------|---------|
| Baseline phase                                 |                     |              |         |
| Trend                                          | 1.04                | 0.98 to 1.10 | 0.24    |
| Intervention phase                             |                     |              |         |
| Change in level                                | 1.19                | 1.01 to 1.42 | 0.04    |
| Change in trend                                | 1.03                | 0.97 to 1.09 | 0.30    |
| Washout phase                                  |                     |              |         |
| Change in level                                | 1.17                | 0.82 to 1.68 | 0.39    |
| Change in trend                                | 0.91                | 0.85 to 0.97 | 0.004   |
| Professional category                          |                     |              |         |
| Physician                                      | 1.00                | -            | -       |
| Nurse                                          | 1.37                | 1.28 to 1.46 | <0.001  |
| Auxiliary nurse                                | 1.27                | 1.16 to 1.39 | <0.001  |
| Other                                          | 1.11                | 0.99 to 1.24 | 0.06    |
| Indication for hand hygiene                    |                     |              |         |
| Before touching patient                        | 1.00                | -            | -       |
| Before clean/aseptic procedure                 | 1.20                | 1.09 to 1.32 | <0.001  |
| After body fluid exposure                      | 4.95                | 4.47 to 5.48 | <0.001  |
| After touching patient                         | 2.79                | 2.60 to 3.00 | <0.001  |
| After touching patient surroundings            | 1.52                | 1.41 to 1.65 | <0.001  |
| Patient-to-nurse ratio (per 1-unit increment)† | 0.91                | 0.89 to 0.94 | <0.001  |
| MRSA colonisation pressure‡                    |                     |              |         |
| 0 to 0.7%                                      | 1.00                | -            | -       |
| 0.8 to 3.2%                                    | 0.86                | 0.79 to 0.94 | <0.001  |
| 3.3 to 8.2%                                    | 0.90                | 0.81 to 1.01 | 0.07    |
| >8.2%                                          | 0.78                | 0.68 to 0.90 | <0.001  |

MRSA, meticillin resistant *Staphylococcus aureus*.

\*Random effects for intercepts at the hospital and ward levels and random baseline trends at the hospital level were all statistically significant, though baseline trends and intercepts showed no evidence of correlation.

†Calculated by dividing the mean patient load by mean number of nurses working on the ward at a given time (averaged over day, evening, and night shifts) for each month.

‡Calculated by dividing the patient-days of subjects known to be colonised or infected with meticillin resistant *Staphylococcus aureus* by the total number of patient-days in the ward in any given study month. This variable was divided into quartiles for the analysis.

**Table A4: Full model results for the multiple segmented multilevel Poisson regression models showing adjusted incidence rate ratios for changes in level and trend of nosocomial meticillin resistant *Staphylococcus aureus* rates\***

| Variable                                                   | MRSA clinical isolates (per 100 susceptible patients) |              |         | Total MRSA infections (per 100 admissions) |              |         | MRSA surgical site infections (per 100 procedures) |              |         |
|------------------------------------------------------------|-------------------------------------------------------|--------------|---------|--------------------------------------------|--------------|---------|----------------------------------------------------|--------------|---------|
|                                                            | aIRR                                                  | 95% CI       | p Value | aIRR                                       | 95% CI       | p Value | aIRR                                               | 95% CI       | p Value |
| Baseline phase                                             |                                                       |              |         |                                            |              |         |                                                    |              |         |
| Trend                                                      | 0.97                                                  | 0.89 to 1.06 | 0.55    | 1.00                                       | 0.90 to 1.11 | 0.98    | 1.02                                               | 0.90 to 1.16 | 0.75    |
| Intervention phase                                         |                                                       |              |         |                                            |              |         |                                                    |              |         |
| Change in level                                            |                                                       |              |         |                                            |              |         |                                                    |              |         |
| Enhanced hand hygiene                                      | 1.44                                                  | 0.96 to 2.15 | 0.08    | 1.28                                       | 0.79 to 2.06 | 0.31    | 1.25                                               | 0.70 to 2.23 | 0.45    |
| Screening and decolonisation                               | 0.87                                                  | 0.49 to 1.57 | 0.65    | 0.97                                       | 0.49 to 1.92 | 0.94    | 0.79                                               | 0.35 to 1.79 | 0.58    |
| Combined                                                   | 1.63                                                  | 0.96 to 2.75 | 0.07    | 1.17                                       | 0.62 to 2.20 | 0.63    | 1.33                                               | 0.59 to 3.00 | 0.49    |
| Change in trend                                            |                                                       |              |         |                                            |              |         |                                                    |              |         |
| Enhanced hand hygiene                                      | 0.99                                                  | 0.91 to 1.09 | 0.88    | 0.99                                       | 0.89 to 1.10 | 0.84    | 0.98                                               | 0.86 to 1.12 | 0.75    |
| Screening and decolonisation                               | 0.94                                                  | 0.85 to 1.05 | 0.26    | 0.93                                       | 0.82 to 1.05 | 0.27    | 0.90                                               | 0.78 to 1.04 | 0.16    |
| Combined                                                   | 0.88                                                  | 0.79 to 0.98 | 0.02    | 0.90                                       | 0.80 to 1.02 | 0.10    | 0.86                                               | 0.74 to 1.01 | 0.06    |
| Washout phase                                              |                                                       |              |         |                                            |              |         |                                                    |              |         |
| Change in level                                            | 1.90                                                  | 0.91 to 3.95 | 0.09    | 1.52                                       | 0.66 to 3.51 | 0.32    | 1.90                                               | 0.69 to 5.27 | 0.21    |
| Change in trend                                            | 1.02                                                  | 0.91 to 1.15 | 0.74    | 1.00                                       | 0.88 to 1.15 | 0.95    | 0.95                                               | 0.80 to 1.12 | 0.53    |
| Patient-to-nurse ratio (per 1-unit increment)†             | 1.01                                                  | 0.94 to 1.08 | 0.87    | 1.01                                       | 0.93 to 1.09 | 0.84    | 1.04                                               | 0.96 to 1.14 | 0.33    |
| Calendar month                                             |                                                       |              |         |                                            |              |         |                                                    |              |         |
| January                                                    | 1.00                                                  | -            | -       | 1.00                                       | -            | -       | 1.00                                               | -            | -       |
| February                                                   | 0.83                                                  | 0.54 to 1.28 | 0.41    | 0.89                                       | 0.53 to 1.50 | 0.67    | 0.76                                               | 0.40 to 1.45 | 0.41    |
| March                                                      | 1.16                                                  | 0.78 to 1.72 | 0.47    | 1.49                                       | 0.94 to 2.35 | 0.09    | 1.34                                               | 0.76 to 2.37 | 0.31    |
| April                                                      | 0.93                                                  | 0.61 to 1.43 | 0.75    | 1.16                                       | 0.70 to 1.90 | 0.57    | 0.81                                               | 0.42 to 1.55 | 0.52    |
| May                                                        | 1.19                                                  | 0.78 to 1.83 | 0.42    | 1.33                                       | 0.80 to 2.21 | 0.27    | 1.31                                               | 0.71 to 2.41 | 0.39    |
| June                                                       | 1.40                                                  | 0.92 to 2.12 | 0.11    | 1.40                                       | 0.84 to 2.33 | 0.19    | 1.45                                               | 0.79 to 2.64 | 0.23    |
| July                                                       | 1.31                                                  | 0.86 to 1.99 | 0.21    | 1.44                                       | 0.88 to 2.38 | 0.15    | 1.52                                               | 0.83 to 2.77 | 0.17    |
| August                                                     | 1.20                                                  | 0.78 to 1.84 | 0.40    | 1.14                                       | 0.67 to 1.94 | 0.63    | 1.22                                               | 0.65 to 2.30 | 0.54    |
| September                                                  | 1.40                                                  | 0.92 to 2.13 | 0.11    | 1.39                                       | 0.84 to 2.32 | 0.20    | 1.41                                               | 0.77 to 2.58 | 0.27    |
| October                                                    | 0.89                                                  | 0.59 to 1.34 | 0.58    | 1.06                                       | 0.65 to 1.72 | 0.81    | 1.19                                               | 0.67 to 2.10 | 0.55    |
| November                                                   | 1.04                                                  | 0.70 to 1.55 | 0.85    | 1.13                                       | 0.70 to 1.82 | 0.63    | 1.11                                               | 0.62 to 1.98 | 0.72    |
| December                                                   | 1.29                                                  | 0.87 to 1.90 | 0.21    | 1.34                                       | 0.84 to 2.14 | 0.23    | 1.33                                               | 0.75 to 2.35 | 0.32    |
| Surgical subspecialty                                      |                                                       |              |         |                                            |              |         |                                                    |              |         |
| Orthopaedics                                               | 1.00                                                  | -            | -       | 1.00                                       | -            | -       | 1.00                                               | -            | -       |
| Vascular                                                   | 2.91                                                  | 1.44 to 5.88 | 0.003   | 2.07                                       | 0.98 to 4.37 | 0.06    | 1.90                                               | 0.73 to 4.92 | 0.19    |
| Cardiothoracic                                             | 1.10                                                  | 0.52 to 2.34 | 0.80    | 1.16                                       | 0.55 to 2.45 | 0.70    | 1.35                                               | 0.55 to 3.27 | 0.51    |
| General                                                    | 1.65                                                  | 0.70 to 3.89 | 0.26    | 1.92                                       | 0.81 to 4.55 | 0.14    | 2.06                                               | 0.72 to 5.88 | 0.18    |
| Abdominal                                                  | 1.51                                                  | 0.69 to 3.29 | 0.30    | 1.44                                       | 0.67 to 3.13 | 0.35    | 1.30                                               | 0.52 to 3.27 | 0.58    |
| Urology                                                    | 0.82                                                  | 0.33 to 2.05 | 0.67    | 0.63                                       | 0.24 to 1.64 | 0.34    | 0.90                                               | 0.29 to 2.86 | 0.87    |
| Neurosurgery                                               | 0.79                                                  | 0.22 to 2.78 | 0.71    | 0.85                                       | 0.23 to 3.07 | 0.80    | 0.53                                               | 0.10 to 2.71 | 0.44    |
| Plastic surgery                                            | 0.75                                                  | 0.13 to 4.41 | 0.75    | 0.59                                       | 0.08 to 4.38 | 0.60    | 0.54                                               | 0.06 to 4.51 | 0.57    |
| Baseline HH compliance rate (per increment from 0 to 100%) | 1.56                                                  | 0.32 to 7.53 | 0.58    | 1.11                                       | 0.20 to 6.06 | 0.91    | 1.29                                               | 0.18 to 9.27 | 0.80    |

MRSA, methicillin resistant *Staphylococcus aureus*; aIRR, adjusted incidence rate ratio; HH, hand hygiene.

\*Methicillin resistant *Staphylococcus aureus* was defined as nosocomial if it was isolated from specimens collected more than 48 hours after admission or within 30 days (or 12 months for infections of prosthetic devices) after discharge from the surgical ward. The model used a lagged dependent variable to account for autocorrelation and accounted for overdispersion. Random effects for intercepts at the hospital and ward levels and random baseline trends at the hospital level were all significant, and baseline trends were negatively correlated with intercepts (i.e. hospitals with higher baseline MRSA rates tended to have larger decreases in baseline rates).

†Calculated by dividing the mean patient load by mean number of nurses working on the ward at a given time (averaged over day, evening, and night shifts) for each month.

**Table A5: Full model results for the multiple segmented multilevel Poisson regression models showing changes in nosocomial meticillin resistant *Staphylococcus aureus* rates for the subgroup analysis of clean surgery only\***

| Variable                                                   | MRSA clinical isolates (per 100 susceptible patients) |              |         | Total MRSA infections (per 100 admissions) |              |         | MRSA surgical site infections (per 100 procedures) |               |         |
|------------------------------------------------------------|-------------------------------------------------------|--------------|---------|--------------------------------------------|--------------|---------|----------------------------------------------------|---------------|---------|
|                                                            | aIRR                                                  | 95% CI       | p Value | aIRR                                       | 95% CI       | p Value | aIRR                                               | 95% CI        | p Value |
| Baseline phase                                             |                                                       |              |         |                                            |              |         |                                                    |               |         |
| Trend                                                      | 1.05                                                  | 0.93 to 1.18 | 0.41    | 1.10                                       | 0.94 to 1.28 | 0.23    | 1.11                                               | 0.93 to 1.33  | 0.26    |
| Intervention phase                                         |                                                       |              |         |                                            |              |         |                                                    |               |         |
| Change in level                                            |                                                       |              |         |                                            |              |         |                                                    |               |         |
| Enhanced hand hygiene                                      | 1.31                                                  | 0.75 to 2.30 | 0.34    | 1.06                                       | 0.52 to 2.16 | 0.88    | 1.09                                               | 0.47 to 2.53  | 0.83    |
| Screening and decolonisation                               | 0.87                                                  | 0.41 to 1.85 | 0.71    | 1.03                                       | 0.39 to 2.69 | 0.96    | 0.92                                               | 0.29 to 2.92  | 0.89    |
| Combined                                                   | 1.79                                                  | 0.86 to 3.74 | 0.12    | 1.15                                       | 0.44 to 2.96 | 0.78    | 1.21                                               | 0.39 to 3.73  | 0.75    |
| Change in trend                                            |                                                       |              |         |                                            |              |         |                                                    |               |         |
| Enhanced hand hygiene                                      | 0.89                                                  | 0.78 to 1.01 | 0.06    | 0.88                                       | 0.75 to 1.04 | 0.13    | 0.89                                               | 0.73 to 1.07  | 0.21    |
| Screening and decolonisation                               | 0.85                                                  | 0.74 to 0.97 | 0.02    | 0.83                                       | 0.69 to 0.99 | 0.04    | 0.81                                               | 0.66 to 1.00  | 0.05    |
| Combined                                                   | 0.82                                                  | 0.71 to 0.95 | 0.01    | 0.84                                       | 0.70 to 1.00 | 0.06    | 0.84                                               | 0.68 to 1.03  | 0.10    |
| Washout phase                                              |                                                       |              |         |                                            |              |         |                                                    |               |         |
| Change in level                                            | 3.01                                                  | 1.05 to 8.63 | 0.04    | 2.21                                       | 0.61 to 8.04 | 0.23    | 2.59                                               | 0.59 to 11.46 | 0.21    |
| Change in trend                                            | 0.96                                                  | 0.81 to 1.15 | 0.67    | 0.91                                       | 0.73 to 1.12 | 0.37    | 0.86                                               | 0.67 to 1.09  | 0.21    |
| Patient-to-nurse ratio (per 1-unit increment)†             | 0.99                                                  | 0.91 to 1.07 | 0.73    | 0.99                                       | 0.90 to 1.09 | 0.81    | 0.99                                               | 0.88 to 1.12  | 0.90    |
| Calendar month                                             |                                                       |              |         |                                            |              |         |                                                    |               |         |
| January                                                    | 1.00                                                  | -            | -       | 1.00                                       | -            | -       | 1.00                                               | -             | -       |
| February                                                   | 1.06                                                  | 0.54 to 2.07 | 0.86    | 1.58                                       | 0.66 to 3.81 | 0.31    | 1.22                                               | 0.45 to 3.28  | 0.69    |
| March                                                      | 1.13                                                  | 0.60 to 2.16 | 0.70    | 1.68                                       | 0.72 to 3.95 | 0.23    | 1.51                                               | 0.60 to 3.84  | 0.38    |
| April                                                      | 1.32                                                  | 0.68 to 2.57 | 0.41    | 2.12                                       | 0.89 to 5.03 | 0.09    | 1.52                                               | 0.57 to 4.09  | 0.41    |
| May                                                        | 2.00                                                  | 1.06 to 3.76 | 0.03    | 3.07                                       | 1.34 to 7.04 | 0.01    | 2.61                                               | 1.04 to 6.52  | 0.04    |
| June                                                       | 2.34                                                  | 1.25 to 4.39 | 0.01    | 3.33                                       | 1.43 to 7.74 | 0.01    | 3.06                                               | 1.22 to 7.65  | 0.02    |
| July                                                       | 2.19                                                  | 1.16 to 4.15 | 0.02    | 3.20                                       | 1.35 to 7.57 | 0.01    | 2.94                                               | 1.14 to 7.59  | 0.03    |
| August                                                     | 2.25                                                  | 1.18 to 4.26 | 0.01    | 2.80                                       | 1.18 to 6.65 | 0.02    | 2.77                                               | 1.08 to 7.10  | 0.03    |
| September                                                  | 2.35                                                  | 1.26 to 4.39 | 0.01    | 2.88                                       | 1.24 to 6.72 | 0.01    | 2.89                                               | 1.15 to 7.26  | 0.02    |
| October                                                    | 1.49                                                  | 0.81 to 2.73 | 0.20    | 2.66                                       | 1.20 to 5.90 | 0.02    | 2.39                                               | 1.00 to 5.72  | 0.05    |
| November                                                   | 1.70                                                  | 0.93 to 3.09 | 0.09    | 2.52                                       | 1.12 to 5.67 | 0.03    | 1.86                                               | 0.75 to 4.62  | 0.18    |
| December                                                   | 1.96                                                  | 1.06 to 3.60 | 0.03    | 2.44                                       | 1.06 to 5.66 | 0.04    | 2.02                                               | 0.80 to 5.08  | 0.14    |
| Surgical subspecialty                                      |                                                       |              |         |                                            |              |         |                                                    |               |         |
| Orthopaedics                                               | 1.00                                                  | -            | -       | 1.00                                       | -            | -       | 1.00                                               | -             | -       |
| Vascular                                                   | 2.14                                                  | 1.00 to 4.58 | 0.05    | 1.57                                       | 0.70 to 3.54 | 0.27    | 1.29                                               | 0.50 to 3.33  | 0.60    |
| Cardiothoracic                                             | 1.22                                                  | 0.55 to 2.72 | 0.62    | 1.25                                       | 0.58 to 2.68 | 0.57    | 1.51                                               | 0.68 to 3.38  | 0.31    |
| Neurosurgery                                               | 0.72                                                  | 0.21 to 2.40 | 0.59    | 0.87                                       | 0.22 to 3.42 | 0.84    | 0.78                                               | 0.17 to 3.62  | 0.75    |
| Plastic surgery                                            | 0.57                                                  | 0.11 to 3.03 | 0.51    | 0.50                                       | 0.07 to 3.88 | 0.51    | 0.53                                               | 0.07 to 3.83  | 0.53    |
| Baseline HH compliance rate (per increment from 0 to 100%) | 2.07                                                  | 0.45 to 9.53 | 0.35    | 1.37                                       | 0.29 to 6.53 | 0.69    | 2.15                                               | 0.34 to 13.60 | 0.42    |

MRSA, meticillin resistant *Staphylococcus aureus*; aIRR, adjusted incidence rate ratio; HH, hand hygiene.

\*Meticillin resistant *Staphylococcus aureus* was defined as nosocomial if it was isolated from specimens collected more than 48 hours after admission or within 30 days (or 12 months for infections of prosthetic devices) after discharge from the surgical ward. Clean surgery included cardiothoracic, neuro-, orthopaedic, plastic, and vascular

surgery subspecialties. The model used a lagged dependent variable to account for autocorrelation and accounted for overdispersion. Random effects for intercepts at the hospital and ward levels and random baseline trends at the hospital level were all significant, and baseline trends were negatively correlated with intercepts (i.e. hospitals with higher baseline MRSA rates tended to have larger decreases in baseline rates).

†Calculated by dividing the mean patient load by mean number of nurses working on the ward at a given time (averaged over day, evening, and night shifts) for each month.



**Table A6: Multiple segmented multilevel Poisson regression models showing nosocomial meticillin resistant *Staphylococcus aureus* rates in the washout phase by study arm**

| Variable                     | MRSA clinical isolates (per 100 susceptible patients) |               |         | Total MRSA infections (per 100 admissions) |                |         | MRSA surgical site infections (per 100 procedures) |                |         |
|------------------------------|-------------------------------------------------------|---------------|---------|--------------------------------------------|----------------|---------|----------------------------------------------------|----------------|---------|
|                              | aIRR                                                  | 95% CI        | p Value | aIRR                                       | 95% CI         | p Value | aIRR                                               | 95% CI         | p Value |
| Baseline phase               |                                                       |               |         |                                            |                |         |                                                    |                |         |
| Trend                        | 0.96                                                  | 0.89 to 1.05  | 0.41    | 0.99                                       | 0.89 to 1.09   | 0.81    | 1.02                                               | 0.90 to 1.15   | 0.80    |
| Intervention phase           |                                                       |               |         |                                            |                |         |                                                    |                |         |
| Change in level              |                                                       |               |         |                                            |                |         |                                                    |                |         |
| Enhanced hand hygiene        | 1.37                                                  | 0.90 to 2.07  | 0.138   | 1.21                                       | 0.74 to 1.98   | 0.44    | 1.23                                               | 0.68 to 2.23   | 0.50    |
| Screening and decolonisation | 1.03                                                  | 0.42 to 2.48  | 0.95    | 0.99                                       | 0.36 to 2.74   | 0.99    | 0.86                                               | 0.26 to 2.90   | 0.81    |
| Combined                     | 2.29                                                  | 1.14 to 4.61  | 0.020   | 2.10                                       | 0.88 to 4.99   | 0.093   | 1.57                                               | 0.52 to 4.72   | 0.42    |
| Change in trend              |                                                       |               |         |                                            |                |         |                                                    |                |         |
| Enhanced hand hygiene        | 1.01                                                  | 0.92 to 1.11  | 0.77    | 1.01                                       | 0.91 to 1.13   | 0.83    | 0.99                                               | 0.86 to 1.13   | 0.85    |
| Screening and decolonisation | 0.94                                                  | 0.81 to 1.08  | 0.37    | 0.95                                       | 0.81 to 1.11   | 0.52    | 0.89                                               | 0.73 to 1.09   | 0.27    |
| Combined                     | 0.84                                                  | 0.74 to 0.96  | 0.008   | 0.83                                       | 0.71 to 0.97   | 0.020   | 0.84                                               | 0.70 to 1.02   | 0.081   |
| Washout phase                |                                                       |               |         |                                            |                |         |                                                    |                |         |
| Change in level              |                                                       |               |         |                                            |                |         |                                                    |                |         |
| Enhanced hand hygiene        | 1.43                                                  | 0.64 to 3.21  | 0.39    | 1.11                                       | 0.44 to 2.78   | 0.82    | 1.68                                               | 0.55 to 5.07   | 0.36    |
| Screening and decolonisation | 3.16                                                  | 0.50 to 19.96 | 0.22    | 1.93                                       | 0.24 to 15.78  | 0.54    | 2.76                                               | 0.22 to 34.28  | 0.43    |
| Combined                     | 8.65                                                  | 1.20 to 62.29 | 0.032   | 13.31                                      | 1.38 to 128.72 | 0.025   | 4.43                                               | 0.19 to 102.38 | 0.35    |
| Change in trend              |                                                       |               |         |                                            |                |         |                                                    |                |         |
| Enhanced hand hygiene        | 1.05                                                  | 0.92 to 1.21  | 0.44    | 1.04                                       | 0.90 to 1.21   | 0.58    | 0.97                                               | 0.80 to 1.16   | 0.71    |
| Screening and decolonisation | 0.98                                                  | 0.73 to 1.32  | 0.90    | 0.93                                       | 0.64 to 1.34   | 0.70    | 0.90                                               | 0.58 to 1.40   | 0.64    |
| Combined                     | 0.89                                                  | 0.57 to 1.39  | 0.62    | 0.90                                       | 0.57 to 1.43   | 0.66    | 0.86                                               | 0.42 to 1.74   | 0.67    |

**Table A7: Exploratory analysis using multiple segmented multilevel Poisson regression models including interventions implemented by centres as covariates in the model\***

| Variable               | MRSA clinical isolates (per 100 susceptible patients) |              |         | Total MRSA infections (per 100 admissions) |              |         |
|------------------------|-------------------------------------------------------|--------------|---------|--------------------------------------------|--------------|---------|
|                        | aIRR                                                  | 95% CI       | p Value | aIRR                                       | 95% CI       | p Value |
| Baseline phase         |                                                       |              |         |                                            |              |         |
| Trend                  | 1.00                                                  | 0.95 to 1.05 | 0.92    | 1.00                                       | 0.95 to 1.06 | 0.92    |
| Hand hygiene promotion |                                                       |              |         |                                            |              |         |
| Change in level        | 1.05                                                  | 0.87 to 1.27 | 0.63    | 1.03                                       | 0.83 to 1.28 | 0.80    |
| Change in trend        | 0.98                                                  | 0.92 to 1.04 | 0.47    | 0.99                                       | 0.92 to 1.06 | 0.68    |
| MRSA screening         |                                                       |              |         |                                            |              |         |
| Change in level        | 0.71                                                  | 0.40 to 1.26 | 0.24    | 0.95                                       | 0.49 to 1.84 | 0.88    |
| Change in trend†       | 0.91                                                  | 0.85 to 0.98 | 0.01    | 0.92                                       | 0.85 to 0.99 | 0.03    |

MRSA, meticillin resistant *Staphylococcus aureus*; aIRR, adjusted incidence rate ratio.

\*The models used a lagged dependent variable to account for autocorrelation and adjusted for staffing (patient-to-nurse ratios), seasonal effects, type of surgical ward, and baseline hand hygiene compliance rates. The model also accounted for overdispersion. Random effects for intercepts at the hospital and ward levels and random baseline trends at the hospital level were all significant, though there was no evidence that baseline trends significantly correlated with intercepts.

†Each additional month with x% compliance with admission screening would be associated with a reduction in the MRSA isolation rate by a factor of  $\text{aIRR}^{x/100}$ .

**Figure A1** Nosocomial meticillin resistant *Staphylococcus aureus* isolation rates from clinical specimens by hospital

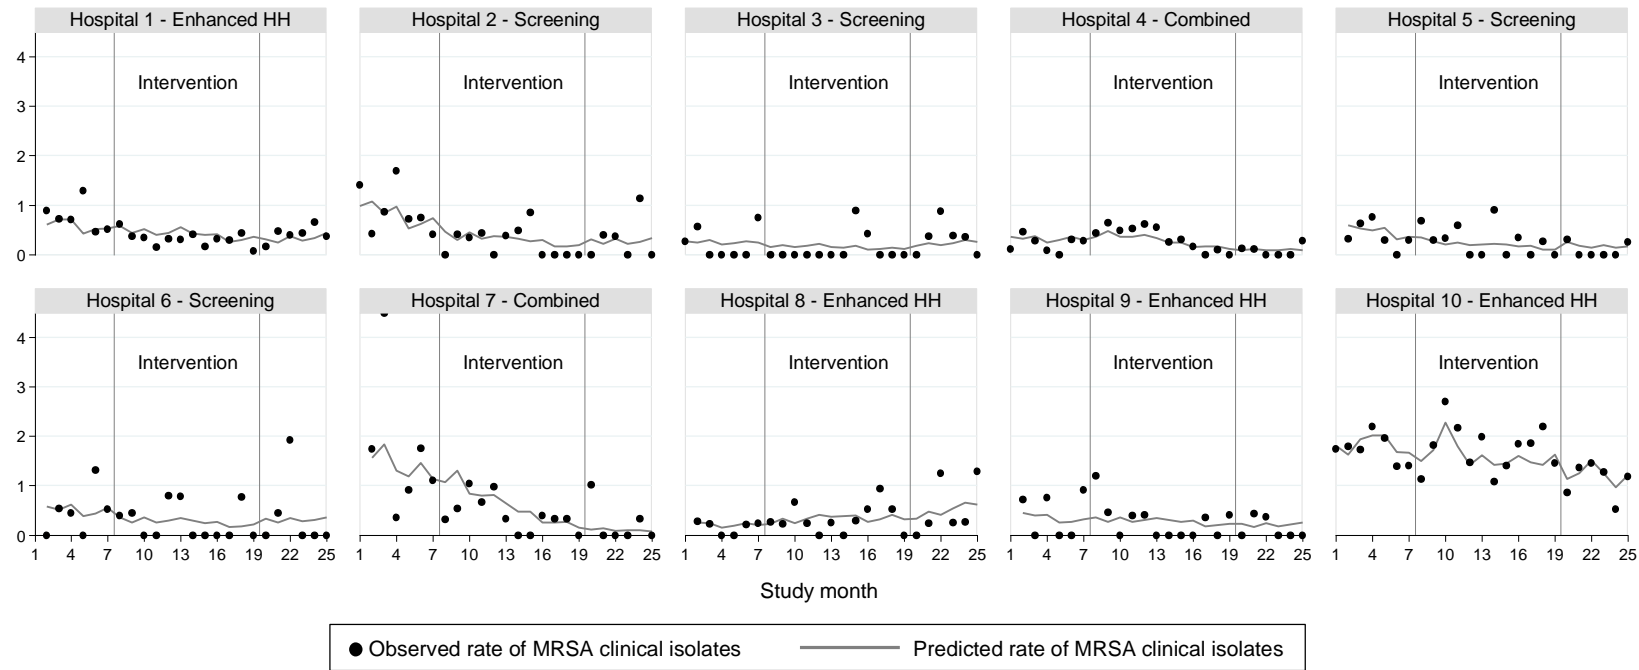

The solid dots represent the observed meticillin resistant *Staphylococcus aureus* (MRSA) rates while the lines represent the predicted MRSA rates based on the regression models. MRSA, meticillin resistant *Staphylococcus aureus*; HH, hand hygiene.
